## Correction: Dehydroandrographolide, an iNOS inhibitor, extracted from *Andrographis paniculata* (Burm.f.) Nees, induces autophagy in human oral cancer cells

Ming-Ju Hsieh, Chiao-Wen Lin, Hui-Ling Chiou, Shun-Fa Yang and Mu-Kuan Chen

**Present:** Due to an error in proofreading, figure 8A is incorrect.

**Corrected:** The proper figure 8A is shown below. The authors sincerely apologize for this oversight.

Original article: Oncotarget. 2015; 6(31):30831-30849. doi: 10.18632/oncotarget.5036.

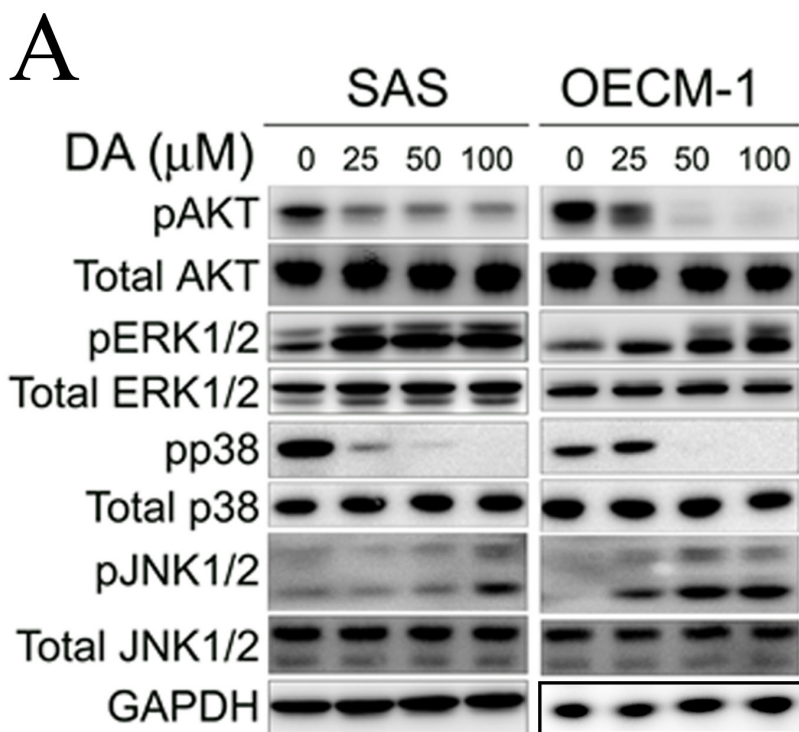

**Figure 8: Effect of Akt and MAPK pathway on DA induces cell autophagy processes.** A. SAS and OECM-1 cells were treated with DA (0–100  $\mu$ M) for 48 h and then subjected to western blotting for Akt, ERK1/2, p38 and JNK1/2 with GAPDH acting as an internal control.
